# Supplementary material for: The association between serum cadmium and diabetes in the general population: A cross-sectional study from NHANES (1999–2020)
Source: PubMed Central journal article supplement (PMC9768494; doi:10.3389/fnut.2022.966500), 2022-12-07
Supplement: Data_Sheet_1.pdf [file Data_Sheet_1.pdf]

## **Appendix**

### **Supplement Table legends:**

**Table S1. Serum cadmium levels under high cadmium exposure after multiple interpolation**

**Table S2. Serum cadmium levels under high cadmium exposure after multiple interpolation**

**Table S3. Serum cadmium levels as categorical variable under low cadmium exposure after multiple interpolation**

**Table S4. Serum cadmium levels as categorical variable under high cadmium exposure after multiple interpolation**

**Table S1. Serum cadmium levels under high cadmium exposure after multiple interpolation**

| Table S1. Serum cadmium levels under high cadmium exposure after multiple interpolation |                        |         |                        |         |                        |         |                        |         |                        |         |
|-----------------------------------------------------------------------------------------|------------------------|---------|------------------------|---------|------------------------|---------|------------------------|---------|------------------------|---------|
| Variable                                                                                | IMP 1                  |         | IMP 2                  |         | IMP 3                  |         | IMP 4                  |         | IMP 5                  |         |
|                                                                                         | OR(95%CI)              | P-value | OR(95%CI)              | P-value | OR(95%CI)              | P-value | OR(95%CI)              | P-value | OR(95%CI)              | P-value |
| Model 1                                                                                 | 1.009<br>(0.894~1.139) | 0.881   | 1.009<br>(0.894~1.139) | 0.883   | 1.003<br>(0.889~1.132) | 0.955   | 1.007<br>(0.892~1.136) | 0.912   | 1.004<br>(0.889~1.133) | 0.954   |
| Model 2                                                                                 | 0.742<br>(0.647~0.852) | <0.001  | 0.743<br>(0.647~0.853) | <0.001  | 0.737<br>(0.642~0.847) | <0.001  | 0.745<br>(0.649~0.856) | <0.001  | 0.741<br>(0.645~0.851) | <0.001  |
| Model 3                                                                                 | 0.793<br>(0.684~0.92)  | 0.002   | 0.791<br>(0.682~0.918) | 0.002   | 0.793<br>(0.683~0.920) | 0.002   | 0.798<br>(0.688~0.925) | 0.003   | 0.789<br>(0.680~0.915) | 0.002   |
| Model 4                                                                                 | 0.806<br>(0.693~0.936) | 0.005   | 0.805<br>(0.692~0.936) | 0.005   | 0.806<br>(0.693~0.937) | 0.005   | 0.811<br>(0.698~0.943) | 0.007   | 0.803<br>(0.690~0.934) | 0.004   |

Model 1: non-adjusted

Model 2: age,gender,race,education

Model 3: Model 2+ BMI,waist,smolking,alchol use,hypertension

Model 4: Model 3+ HDL, TG, ALT, GGT, LDH, ALB

Note: IMP represents the interpolated data

**Table S2. Serum cadmium levels under high cadmium exposure after multiple interpolation**

**Table S2. Serum cadmium levels under high cadmium exposure after multiple interpolation**

| Variable | IMP 1               |                 | IMP 2               |                 | IMP 3               |                 | IMP 4               |                 | IMP 5               |                 |
|----------|---------------------|-----------------|---------------------|-----------------|---------------------|-----------------|---------------------|-----------------|---------------------|-----------------|
|          | OR(95%CI)           | <i>P</i> -value | OR(95%CI)           | <i>P</i> -value | OR(95%CI)           | <i>P</i> -value | OR(95%CI)           | <i>P</i> -value | OR(95%CI)           | <i>P</i> -value |
| Model 1  | 0.99<br>(0.97~1.02) | 0.48            | 0.99<br>(0.97~1.02) | 0.50            | 0.99<br>(0.97~1.01) | 0.43            | 0.99<br>(0.97~1.02) | 0.50            | 0.99<br>(0.97~1.02) | 0.58            |
| Model 2  | 1.01<br>(0.99~1.03) | 0.43            | 1.01<br>(0.99~1.03) | 0.44            | 1.01<br>(0.99~1.03) | 0.47            | 1.01<br>(0.99~1.03) | 0.42            | 1.01<br>(0.99~1.03) | 0.33            |
| Model 3  | 1.01<br>(0.98~1.04) | 0.49            | 1.01<br>(0.98~1.04) | 0.48            | 1.01<br>(0.98~1.04) | 0.47            | 1.01<br>(0.98~1.04) | 0.46            | 1.01<br>(0.99~1.04) | 0.37            |
| Model 4  | 1.01<br>(0.98~1.04) | 0.54            | 1.01<br>(0.98~1.04) | 0.54            | 1.01<br>(0.98~1.04) | 0.53            | 1.01<br>(0.98~1.04) | 0.53            | 1.01<br>(0.99~1.04) | 0.41            |

Model 1: non-adjusted

Model 2: age,gender,race,education

Model 3: Model 2+ BMI,waist,smolking,alchol

use,hypertension

Model 4: Model 3+ HDL, TG, ALT, GGT, LDH, ALB

Note: IMP represents the interpolated data

**Table S3. Serum cadmium levels as categorical variable under low cadmium exposure after multiple interpolation**

**Table S3. Serum cadmium levels as categorical variable under low cadmium exposure after multiple interpolation**

| Variable         | Model 1             |         | Model 2             |         | Model 3             |         | Model 4             |         |
|------------------|---------------------|---------|---------------------|---------|---------------------|---------|---------------------|---------|
|                  | OR(95%CI)           | P-value | OR(95%CI)           | P-value | OR(95%CI)           | P-value | OR(95%CI)           | P-value |
| Q1               | 1(Ref)              |         | 1(Ref)              |         | 1(Ref)              |         | 1(Ref)              |         |
| Q2               | 0.89<br>(0.66~1.19) | 0.42    | 0.74<br>(0.54~1.01) | 0.06    | 0.82<br>(0.59~1.15) | 0.26    | 0.85<br>(0.60~1.19) | 0.34    |
| Q3               | 1 (0.74~1.35)       | 0.99    | 0.6<br>(0.43~0.84)  | <0.01   | 0.69<br>(0.48~0.98) | 0.04    | 0.72<br>(0.50~1.03) | 0.07    |
| Q4               | 1.03<br>(0.76~1.38) | 0.86    | 0.51<br>(0.37~0.72) | <0.01   | 0.61<br>(0.42~0.87) | <0.01   | 0.64<br>(0.44~0.92) | 0.02    |
| P for trend test | 1.02<br>(0.93~1.12) | 0.66    | 0.80<br>(0.72~0.89) | <0.01   | 0.85<br>(0.75~0.95) | <0.01   | 0.86<br>(0.76~0.97) | 0.01    |

Model 1: non-adjusted

Model 2: age,gender,race,education

Model 3: Model 2+ BMI,waist,smolking,alchol use,hypertension

Model 4: Model 3+ HDL, TG, ALT, GGT, LDH, ALB

**Table S4. Serum cadmium levels as categorical variable under high cadmium exposure after multiple interpolation**

**Table S4. Serum cadmium levels as categorical variable under high cadmium exposure after multiple interpolation**

| Variable         | Model 1             |         | Model 2             |         | Model 3             |         | Model 4             |         |
|------------------|---------------------|---------|---------------------|---------|---------------------|---------|---------------------|---------|
|                  | OR(95%CI)           | P-value | OR(95%CI)           | P-value | OR(95%CI)           | P-value | OR(95%CI)           | P-value |
| Q1               | 1(Ref)              |         | 1(Ref)              |         | 1(Ref)              |         | 1(Ref)              |         |
| Q2               | 0.90<br>(0.61~1.34) | 0.60    | 0.90<br>(0.60~1.36) | 0.63    | 0.89<br>(0.58~1.38) | 0.62    | 0.89<br>(0.58~1.39) | 0.62    |
| Q3               | 0.86<br>(0.57~1.28) | 0.45    | 0.91<br>(0.6~1.4)   | 0.68    | 0.90<br>(0.56~1.45) | 0.67    | 0.88<br>(0.54~1.42) | 0.60    |
| Q4               | 0.79<br>(0.54~1.17) | 0.24    | 1.06<br>(0.7~1.61)  | 0.78    | 1.06<br>(0.63~1.76) | 0.83    | 1.03<br>(0.61~1.72) | 0.91    |
| P for trend test | 0.93<br>(0.82~1.05) | 0.24    | 1.02<br>(0.89~1.17) | 0.78    | 1.01<br>(0.86~1.2)  | 0.87    | 1<br>(0.85~1.19)    | 0.96    |

Model 1: non-adjusted

Model 2: age,gender,race,education

Model 3: Model 2+ BMI,waist,smolking,alchol use,hypertension

Model 4: Model 3+ HDL, TG, ALT, GGT, LDH, ALB
